# Supplementary material for: Ultra broadband yellow emitting lead-free metal halide perovskite like compounds with near-unity emission quantum yields
Source: Royal Society of Chemistry journal article supplement (doi:10.1039/d4tc04804k), 2025-01-01
Supplement: d4tc04804k1.pdf [file d4tc04804k1.pdf]

## **Ultra Broadband Yellow Emitting Lead-Free Metal Halide Perovskite like Compound with Near-Unity Emission Quantum Yield**

Sayed Ali Khan<sup>1,2\*</sup>, Noor Zamin Khan<sup>3</sup>, Jahangeer Ahmed<sup>4</sup>, Marcin Runowski<sup>6</sup>,  
Saad M Alshehri<sup>4</sup>, Simeon Agathopoulos<sup>5</sup>, Simon J. Teat<sup>7</sup>, Jing Li<sup>2,1\*</sup>

<sup>1</sup>Hoffmann Institute of Advanced Materials, Shenzhen Polytechnic University, Liuxian Blvd,  
Nanshan District, Shenzhen, 5018055, P.R. China

<sup>2</sup>Department of Chemistry and Chemical Biology, Rutgers University, Piscataway, New Jersey  
08854, United States

<sup>3</sup>School of Physics and Material Sciences, Guangzhou University, Guangzhou 510006, China

<sup>4</sup>Department of Chemistry, Collage of Science, King Saud University, Riyadh 11451, Saudi  
Arabia

<sup>5</sup>Department of Materials Science and Engineering, University of Ioannina, GR-451 10 Ioannina,  
Greece

<sup>6</sup>Adam Mickiewicz University, Faculty of Chemistry, Uniwersytetu Poznańskiego 8, 61-614  
Poznań, Poland

<sup>7</sup>Advanced Light Source, Lawrence Berkeley National Laboratory, Berkeley, California 94720,  
United States

\*Corresponding author: Jing Li

Email: [jingli@rutgers.edu](mailto:jingli@rutgers.edu)

\*\*Corresponding author: Sayed Ali Khan

Email: [sayedali@szu.edu.cn](mailto:sayedali@szu.edu.cn)

**Table S1: The fundamental bond length (Å) of BCNCI single crystals**

---

|         |        |         |        |
|---------|--------|---------|--------|
| Cu1-I1  | 2.5285 | Na1-C15 | 3.1266 |
| Cu1-I2  | 2.5810 | Na1-C24 | 3.040  |
| Cu1-I3  | 2.5344 | Na1-C25 | 3.080  |
| Cu2-I1  | 2.5884 | Na1-C28 | 3.113  |
| Cu2-I2  | 2.5178 | O1-C6   | 1.361  |
| Cu2-I3  | 2.5738 | O1-C7   | 1.431  |
| Cu3-I1  | 2.5650 | O2-C8   | 1.405  |
| Cu3-I2  | 2.5786 | O2-C9   | 1.432  |
| Cu3-I3  | 2.6162 | O3-C10  | 1.418  |
| Cu4-I1  | 2.5599 | O3-C11  | 1.426  |
| Cu4-I2  | 2.5933 | O4-C12  | 1.415  |
| Cu4-I3  | 2.5443 | O4-C13  | 1.411  |
| Na1-O6  | 2.2097 | O5-C1   | 1.3682 |
| Na1-O7  | 2.3549 | O5-C14  | 1.423  |
| Na1-O8  | 2.3406 | O7-C24  | 1.430  |
| Na1-O9  | 2.333  | C7-C25  | 1.428  |
| Na1-O10 | 2.3845 | O8-C26  | 1.423  |
| Na1-O11 | 2.3188 | O8-C27  | 1.422  |
|         |        | O9-C28  | 1.434  |
|         |        | O10-C20 | 1.3664 |
|         |        | O10-C21 | 1.432  |
|         |        | O11-C22 | 1.438  |
|         |        | O11-C23 | 1.415  |

---



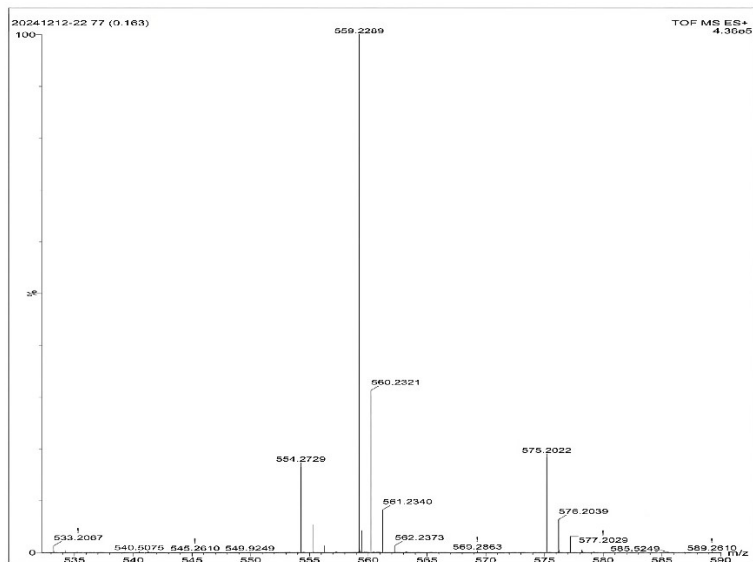

Figure S1: The measure of mass of the synthesized compound which confirms the peak of the legends Benzo-15-crown-5 or  $[C_{14}H_{20}O_5]_2$  mass.

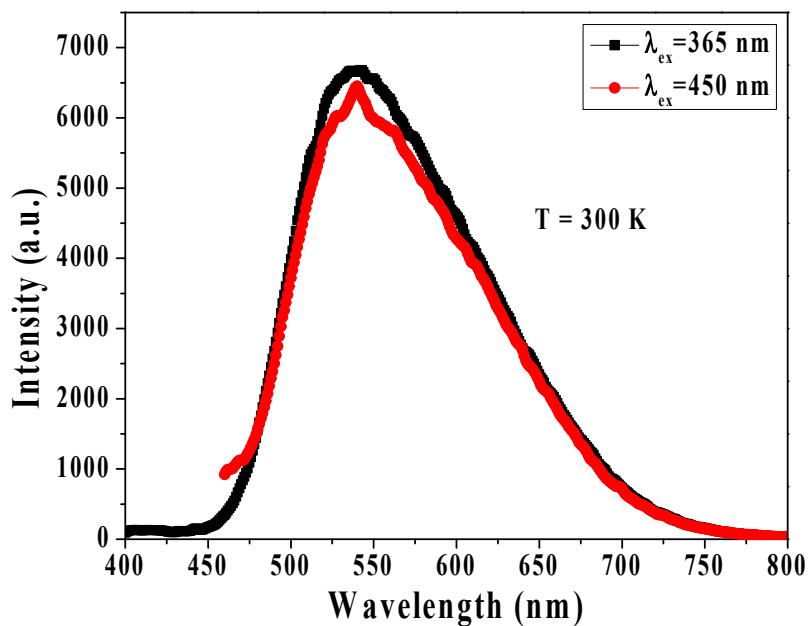

Figure S2: Room temperature (RT) photoluminescence emission of the synthesized (benzo-15-crown-5) $_2$ NaH $_2$ OCu $_4$ I $_6$  crystals under 365 nm (UV) and 450 nm (blue) light irradiation.

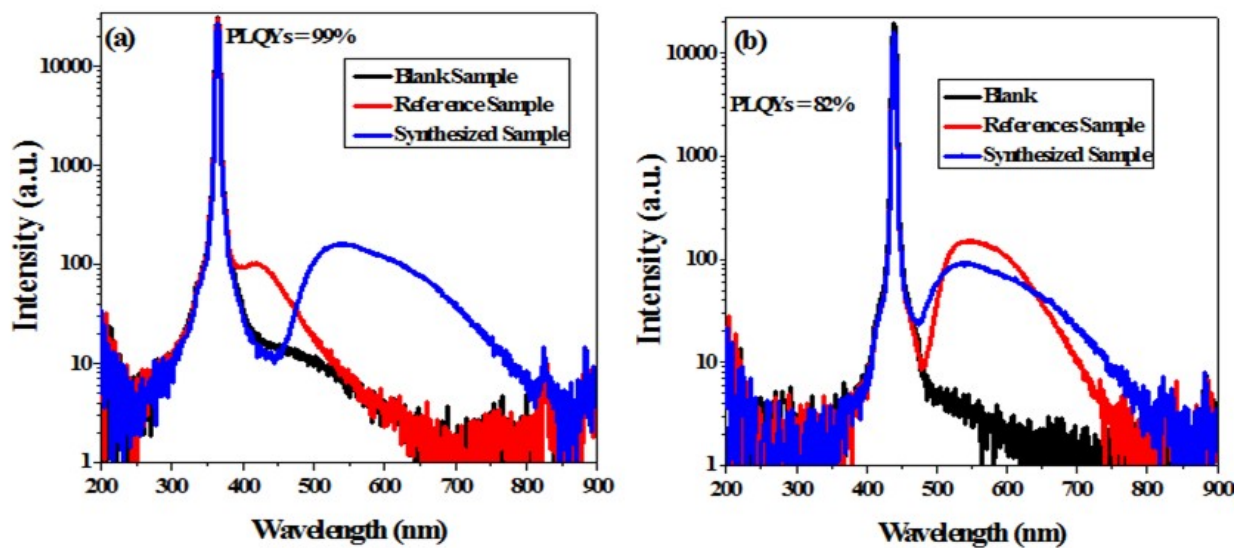

Figure S3: Emission spectra used to calculate the PLQYs of the synthesized (benzo-15-crown-5)<sub>2</sub>NaH<sub>2</sub>OCu<sub>4</sub>I<sub>6</sub> halides (a) under 365 nm excitation, and (b) under 450 nm excitation respectively.

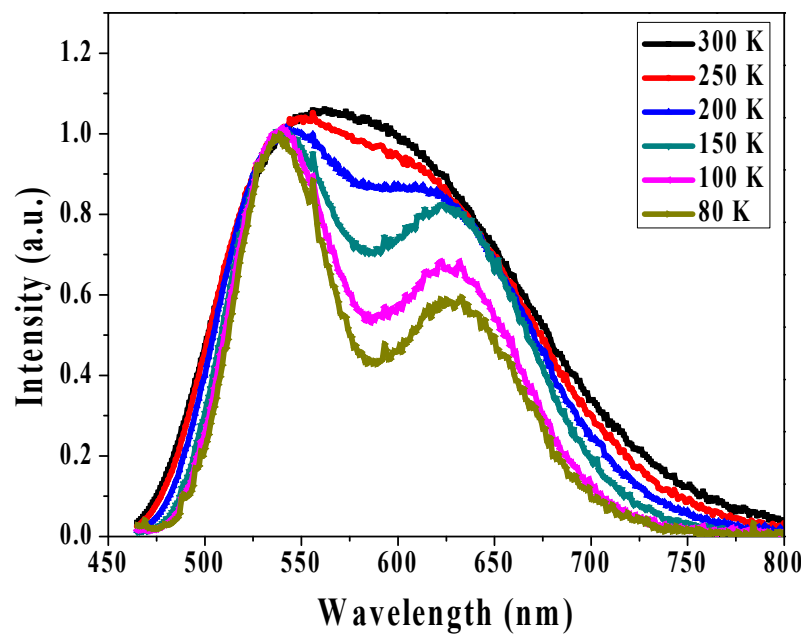

Figure S4: Temperature dependent photoluminescence (300 K, 250, 200, 150, 100 and 80K) under 450 nm blue light irradiation.
